---

# Observation Tree Approach: Active Learning relying on Testing

MICHAL SOUCHA AND KIRILL BOGDANOV

*Department of Computer Science  
The University of Sheffield  
Sheffield, S1 4DP, UK*

*Email: {msoucha1, k.bogdanov}@sheffield.ac.uk*

---

The correspondence of active learning and testing of finite-state machines has been known for a while, however, it was not utilized in the learning. We propose a new framework called the *observation tree approach* that allows one to use the testing theory to improve the performance of active learning. The improvement is demonstrated on three novel learning algorithms that implement the observation tree approach. They outperform the standard learning algorithms, such as the L\* algorithm, in the setting where a minimally adequate teacher provides counterexamples. Moreover, they can also significantly reduce the dependency on the teacher using the assumption of extra states that is well-established in the testing of finite-state machines. This is immensely helpful as a teacher does not have to be available if one learns a model of a black box, such as a system only accessible via a network.

*Keywords: Model Inference; Active Learning; Finite-State Machine; Automata Inference; Observation Tree; Software testing*

*Received 00 January 2009; revised 00 Month 2009*

---

## 1. INTRODUCTION

Finite-state machines can model a wide variety of systems, such as communication protocols, hardware components or software projects. If a model of a system is not available explicitly or one wants to determine how the system behaves, machine learning methods can be used.

Knowing the inner representation of a system is the main goal of reverse engineering and it is a crucial part of many other related fields, for example, testing and verification. There are two main approaches to learning, active and passive. *Passive learning* derives a model of a system from given traces, or input sequences with corresponding responses. In contrast, *active learning* interacts with the system by asking for responses on particular input sequences chosen by the learner. The process of learning is stepwise, on each step a tentative model is expanded based on the output from a previous sequence and a sequence to query next is generated.

The contribution of the paper is to show the **beneficial use of testing theory in active learning** of finite-state machines. A new approach to learning will be described in Section 4. The improvement of the new approach emerges from the comparison with the framework that covers the standard learning algorithms such as the L\* algorithm. Section 4 also proposes three new learning algorithms that are based on the new approach. The experimental evaluation in Section 5 then confirms the improvement in the learning by the new learning algorithms compared to the standard ones.

## 2. BACKGROUND

This section defines the type of finite-state machines used in this paper and it explains testing and active learning on a simple example.

### 2.1. Finite-State Machine

A finite-state machine (FSM) is a model consisting of states and transitions between states. According to the received input, the FSM changes its current state and responds with corresponding output. There are many different definitions of finite-state machines in the literature. Active automata learning deals with *deterministic finite automata* (DFA) whereas active learning of finite-state machines works rather with *Mealy machines* as they describe reactive systems more precisely. A *Moore machine* is another type of finite-state machines. The difference is mainly the position of outputs in a model. Moore machines and deterministic finite automata have outputs tied to states. In contrast, outputs are only on transitions in the case of Mealy machines. This section proposes a general model called *deterministic finite-state machine* (DFSM) that have outputs both on states and on transitions.

There are two functions that describe the behaviour of a model, a transition and an output functions. Generally, both functions take an input symbol and produce either a next state, that is, a state where the transition with the input leads, or an output symbol that is observed if the transition is followed. Two special symbols are introduced to cover both Moore and Mealy machines in one definition. An

input symbol  $\uparrow$  called *stOut* requests the state output and the current state of the machine is not changed when asked. An output symbol  $\downarrow$  called *noOut* represents ‘no response’.

**DEFINITION 2.1.** A deterministic finite-state machine (DFSM) is a septuple  $(S, X, Y, s_0, D, \delta, \lambda)$ , where  $S$  is a finite nonempty set of states and  $s_0$  is an initial state ( $s_0 \in S$ ),  $X$  and  $Y$  are input and output alphabets (a finite nonempty sets of symbols,  $\uparrow \notin X$ ),  $D$  is a domain of defined transitions;  $D \subseteq S \times X$ ,  $D_{\uparrow} = D \cup \{S \times \{\uparrow\}\}$ ,  $\delta$  is a transition function  $\delta : D_{\uparrow} \rightarrow S$  such that  $\forall s \in S : \delta(s, \uparrow) = s$ , and  $\lambda$  is an output function  $\lambda : D_{\uparrow} \rightarrow Y \cup \{\downarrow\}$ .

Note that the *stOut*  $\uparrow$  is not in the input alphabet  $X$  so that it differs from all other input symbols. Similarly, the *noOut*  $\downarrow$  can be declared outside the output alphabet  $Y$  not to interfere with other output symbols but it is usually matched to the output of ‘timeout’ that is in  $Y$ . Therefore, it is not specified if  $\downarrow$  is or is not in  $Y$ . The timeout output represents the situation in which no response is observed during the predefined time limit. Strings over  $X \cup \{\uparrow\}$  are called *input sequences* and strings over  $Y \cup \{\downarrow\}$  are called *output sequences*. ‘Input’ and ‘output’ are sometimes omitted so only ‘sequence’ is used if it is clear from the context. The empty string is denoted  $\varepsilon$ . An input sequence with the corresponding output sequence that was observed is called a *trace*. Any sequence  $w$  can be split into a prefix  $u$  and a suffix  $v$  where  $w = u \cdot v$ .

The initial state  $s_0$  is the current state of the machine before any input is asked. Moreover,  $s_0$  is also the current state if the machine is *reset*. Machines that can be reset are called *resettable*.

Transitions are labelled with input and output symbols. The next state, or the target state, of a transition is defined by the transition function  $\delta$  and the function  $\lambda$  assigns an output symbol to the transition. This paper works only with *completely-specified* machines, that is, DFSMs that have all transitions defined;  $D = S \times X$ .

An example of a DFSM is shown in Fig. 1. The model on the right captures a part of the map E shown on the left such that the map is formed of the grid of tiles and every tile is modelled by a state. The agent that is directed by the user can move in four directions and to explore the map. If the adjacent tile in a particular direction is not accessible, that is, it is outside the map or there is a wall, then the agent stays on the same tile and C is received as the response to the input corresponding to the direction. Otherwise, the agent moves in the chosen direction and the output F is obtained as the response. For instance,  $\delta(s_0, \text{right}) = s_2$  and  $\lambda(s_0, \text{right}) = \text{F}$ . Each tile can contain an object. The agent asks the input  $\uparrow$  in order to find out which object is on the tile where the agent stands; there is usually nothing (the output N), for example,  $\lambda(s_0, \uparrow) = \text{N}$ . Note that the agent does not move from the tile while exploring it, that is,  $\delta(s_i, \uparrow) = s_i$  for any  $i$ . The map E (Fig. 1) is from the GridWorld scenario of the Brain Simulator [1]. The GridWorld scenario is similar to the toy environment that motivated the research of one of the first learning algorithm [2].

## 2.2. Testing of Finite-State Machines

A finite-state model of a system is very useful for construction of a *test suite* to test an implementation for equivalence to this model. There is a range of different testing methods known for this, originally developed for testing of communication protocols where testing is purely black box, that is, no internal structure of the implementation is known and it is not possible to observe a state such an implementation is in. A *testing method* would derive a series of tests from the model and if these sequences produce the same response from the model and the implementation, the implementation is deemed correct and otherwise faulty.

Derivation of test sequences requires an a-priori knowledge of the upper bound on the number  $m$  of states in the implementation. Without such a bound, it is not practical to explore all of a state space and hence not possible to have any guarantee of equivalence by testing. Traditional DFSM testing methods (such as the W-method [3, 4]) generate test sequences to explore the state space of the model by visiting every state, attempting every input and then verifying entered states by observing how these states respond to sequences that distinguish them from other states in the model. The model, or the *specification*, is therefore assumed to be minimal. A machine is *minimal* if every state is reachable from the initial one and every two states  $s_i, s_j$  are distinguishable, that is, there is a sequence  $w$  that produces different output sequences when is asked from both  $s_i$  and  $s_j$ ;  $w$  is called *separating sequence* of  $s_i, s_j$ . A set of separating sequences is called *state characterizing set* of  $s_i$  if for each state  $s_j$  different from  $s_i$  the set contains a separating sequence of  $s_i$  and  $s_j$ . In addition, state characterizing sets of all states are called *harmonized state identifiers* (HSI) if for each two states there is a common separating sequence in both corresponding sets.

An *m-complete test suite* is by definition one capable of finding all faults in an implementation of at most  $m$  states. Where a model has  $n < m$  states, one has to consider a possibility of redundant states in an implementation. These states also have to be tested in case they have different transitions leading from them compared to a model. Since it is not known how to enter these states, all sequences of inputs of length  $m - n$  have to be attempted in every state, followed by all possible inputs and then sequences to check the target state. This causes an exponential growth in the number of test sequences. More effective test methods generate sequences that do multiple things at the same time such as combine testing of transitions with checking of states entered by earlier transitions.

An example of separating and test sequences below is depicted using GridWorld map E in Fig. 1. A separating sequence of  $s_0$  and  $s_7$  is the *stOut* input  $\uparrow$  because there is an object on the tile corresponding to  $s_7$ . The action ‘right’ separates  $s_9$  from states  $s_0$  or  $s_2$ . If one wants to test the transition with input ‘down’ from  $s_6$ , a test sequence consists of an access sequence of  $s_6$  (‘right · right’ for instance), then the transition ‘down’ and a separating sequence that identifies the target state  $s_7$  (‘right · left ·  $\uparrow$ ’); one of

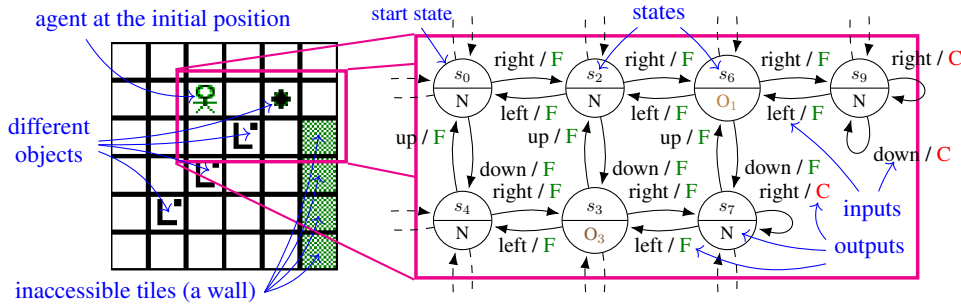

FIGURE 1. GridWorld map E and its part modelled by a deterministic finite-state machine

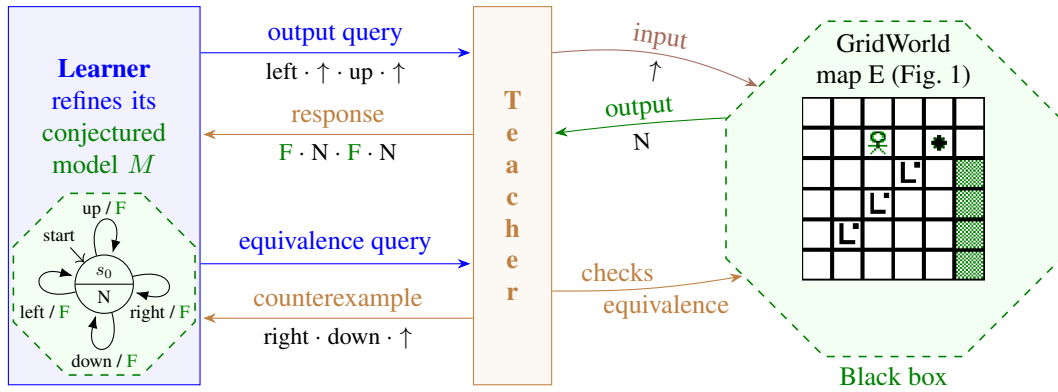

FIGURE 2. Active learning explained on the GridWorld example

complete test sequences thus could be ‘right · right · down · right · left · ↑’. The choice of the separating sequence ‘right · left · ↑’ is explained in Section 4 where so-called adaptive separating sequences are introduced.

### 2.3. Learning of Finite-State Machines

Active learning of finite-state machines usually consists of four entities as sketched in Fig. 2. There is a *learner*, a *teacher*, the *black box* and the *conjectured model*. The learner, or the learning algorithm, interacts with the black box through the teacher in order to construct the conjectured model  $M$  that is equivalent to the black box. There are two types of queries that the learner can ask. An *output query* (OQ), or a membership query in the case of automata learning, asks for the response to the given input sequence. This could be done without the teacher but in general, the teacher can operate as a mapper between symbolic and concrete inputs and outputs used by the learner and the black box. An *equivalence query* (EQ) is asked in order to check if the given conjectured model is output-equivalent to the black box, that is, if both machines respond equivalently to any input sequence. If they are not, a counterexample is provided to the learner.

For models of software, a ‘teacher’ is an unknown program. Therefore, EQ is usually approximated by testing where a testing method constructs test sequences based on the given conjectured model providing some confidence that both the conjectured model and the black box are equivalent. The amount of testing to confirm the correctness

of a program is in the worst case exponential in the number of extra states. The example in Fig. 2 depicts the learner assuming that the GridWorld map E is modelled with the 1-state DFSM and so the counterexample to an EQ could be the sequence ‘right · down · ↑’.

### 3. RELATED WORK

The field of *Active Automata Learning* is based on the notion, proposed in [5], that each finite automaton is *identifiable in the limit* (from positive and negative examples). The  $L^*$  algorithm was then proposed by Angluin in [6]. It learns using an *observation table* that stores observed responses in its cells and the labels of rows and columns form queries, that is, both rows and columns are labelled with input sequences. The rows can be separated into two parts. The first part represents observed states; labels of these rows are access sequences of states. The second part is labelled with one-symbol extensions of the access sequences, that is, it corresponds to next states. The  $L^*$  algorithms aims to have an observation table (OT) that is *closed* and *consistent*. An OT is closed if each row of the second part has the content equal to a row from the first part, that is, each transition leads to an observed state. An OT is consistent if for every two rows of the first part that are equal, the rows corresponding to their one-symbol extensions have the same content as well. In other words, if an observed state is accessed by different sequences, their extensions reach the same states (this is required because the machine is deterministic). When the

OT is both closed and consistent, the OT defines a finite-state machine  $M$  and so the algorithm asks an equivalence query that checks whether  $M$  correctly models the system. There are several versions of the algorithm that differ in processing of provided counterexamples (CE). The original version by Angluin uses all prefixes of CE, thus here called  $L^*$  – *AllPrefixes*. Other versions work with suffixes only, for example [2, 7, 8]. The best processing of long random CEs provides the version *Suffix1by1* [9] that extends the set of separating sequences by suffixes of a CE (starting from the shortest) until the conjectured model responds to the CE correctly.  $L^*$  was adjusted for Mealy machines in [10]. The *Discrimination Tree (DT) algorithm* [11] employs a classification tree to learn instead of an observation table used by the  $L^*$  algorithm. The DT algorithm was improved by the *TTT algorithm* proposed in [12].

A theoretic framework called *observation pack* for efficient active learning was set in [13]. The authors showed that the  $L^*$  and DT algorithms implement their framework and provided lower bounds of numbers of output and equivalence queries and their complexity. Moreover, they introduced a way to reduce the number of equivalence queries (EQ) by identifying all successors of states reached by a sequence of length up to the given number  $l$ . The *Observation Pack (OP) algorithm* proposed in the PhD thesis of Howar [14] combines a discrimination tree and observation tables to infer Mealy machines. Its versions, *OP – AllGlobally*, *OP – OneGlobally* and *OP – OneLocally*, differ in the way how the distinguishing suffix of a CE is used. The thesis [14] also covers incremental approximation of EQs using a testing method. The *GoodSplit algorithm* [15] approximates EQs by querying random input sequences of limited length.

Correspondence of testing and active learning was studied, for example in [16] and [17]. A recent method, called here the *Quotient algorithm* [18], inspired by testing of finite-state machines learns using the *observation tree*. It is based on one of the oldest testing methods, the W-method [3, 4]. There are more advanced testing methods such as the H-method [19], the SPY-method [20], or the SPYH-method [21]. An experimental evaluation of different testing methods of FSMs can be found in [22].

The most promising application of active learning and testing is adaptive model checking (AMC) [23] and grey box checking [24] that are based on black box checking [25]. Both AMC and grey box checking use testing as a task separated from the learning, hence, it duplicates a lot of queries that the learner already asked. AMC employs the  $L^*$  algorithm to learn a model that is then passed to a model checker. If a discrepancy is found, it is checked against the system. A counterexample is returned to  $L^*$  if the discrepancy is not confirmed in the system. On the other hand, if all properties hold in the conjectured model, the W-method is employed to test the model against the system. AMC thus provides software verification. The model checker is an additional oracle which the work presented in this paper would also benefit from. Grey box checking uses knowledge about parts of the system that

are so-called white boxes because the definition of their behaviour is available as source code for example.

A framework is needed for experiments with learning approaches. Such tools are *LearnLib* [26], *libalf* [27] and *FSMLib* [22]. LearnLib is a JAVA framework with GUI for experimenting with learning process; libalf is a C++ library supporting remote execution and Java native interface. FSMLib is a new C++ library used in this paper for handling DFSM and it contains an implementation of numerous test generation and active inference methods [28].

## 4. OBSERVATION TREE APPROACH

The standard learning algorithms mentioned in the previous section have limitations addressed in this section by introducing a new framework called the *observation tree approach*. This approach allows one to use the testing theory in order to minimize the interaction with the black box and still learn its model.

This section is structured as follows. First, drawbacks of standard learning algorithms are discussed as they motivate the research of a new learning procedure. Then, the structure of an observation tree is defined and the new learning approach is proposed in Section 4.3. The learning using the approach is explained on an example in Section 4.4. Section 4.5 describes three new learners that implement the observation tree approach. A high-level description of dealing with inconsistencies is provided in Section 4.6. This section is concluded with a comparison against the observation pack framework and with the time complexity of the approach.

### 4.1. Motivation

The standard learning algorithms ask an equivalence query (EQ) immediately after the conjectured model becomes completely-specified. Hence, the states of the black box are revealed mostly due to the provided counterexamples rather than a targeted exploration. This is captured best by the use of the DT algorithm that needs almost  $n$  EQs to learn a machine with  $n$  states. The  $L^*$  algorithm does not need so many EQs but it requires many more output queries (OQ) in order to learn a completely-specified model. The trade-off between the numbers of EQs and OQs was described by [13] based on the framework of an observation pack. The insufficient generality of the observation pack will be discussed at the end of this section after new learning algorithms are described.

There are two reasons to base active learning on methods of testing of finite-state machines:

1. a faster construction of a completely-specified conjectured model, and
2. a guided exploration of the black box based on the assumption of extra states.

The first reason is a direct improvement compared to the standard learning algorithms as either they do not handle

the observed traces well or they correspond to the W-method. The W-method uses a characterizing set, or a set of separating sequences, for the state identification which is exactly what the L\* algorithm or the Quotient algorithm do. The DT algorithm corresponds to a more efficient testing method, the HSI-method [29], as it identifies states by harmonized state identifiers. The classification tree used by the DT algorithm does not remember observed traces and so the drawback of the DT algorithm is the duplication of many output queries.

The second reason to base active learning on testing is the assumption of extra states that allows the learner to provide the following guarantee.

**DEFINITION 4.1.** (*Complete learning guarantee*) *If the black box is different from the conjectured model of  $n$  states, then the black box has more than  $n + l$  states where  $l$  is the assumed number of extra states.*

The guarantee relies on sufficient conditions that are formally proven for the described FSM testing methods. These conditions capture what should be observed in order to check the equivalence of two machines with bounded number of states. The conditions help learning algorithms to optimize which output query to ask in order to reveal new states or gain the complete learning guarantee. Moreover, the number of asked equivalence queries is decreased dramatically by the assumption of extra states. The experimental evaluation shows that the assumption of just one extra state is sufficient to reveal most states and then there is no need for equivalence queries which are hard to approximate for software.

## 4.2. Structure of an Observation Tree

The observation tree approach is proposed in Algorithm 1. It provides a general framework for a learner to learn with the assumption of extra states based on the testing theory in order to reduce the number of equivalence queries. All traces that are observed during learning are stored in the *observation tree* (OTree).

**DEFINITION 4.2.** *Given a set  $U$  of observed traces of a DFSM  $(S, X, Y, s_0, D, \delta, \lambda)$ , the observation tree is a DFSM  $(R, X, Y, r_0, D_U, \delta_U, \lambda_U)$  such that for each trace  $u_i \in U$  there is a unique state  $r_i \in R$  which only  $u_i$  leads to.*

The observation tree basically groups observed traces with the same prefix. Its transition system has no cycles and looks like a tree with the root as the initial state  $r_0$ . Hence, it corresponds to a prefix tree acceptor (PTA) used in passive grammar inference, for example, by the Blue-Fringe algorithm [30]. The observation tree is the most suitable learning structure because it does not forget any observed trace in contrast with the classification tree of the DT algorithm and it stores each trace only once in contrast with the observation table of the L\* algorithm. In addition, the OTree corresponds to a testing tree that is used to capture test sequences while a testing method is constructing a test suite. Sequences of both the OTree and the testing tree

consist of 4 parts: an access sequence, a tested transition, an extension, and a separating sequence. Each state of the conjectured model (or of the specification in the case of testing) corresponds to a reference node (RN) of the OTree (or the testing tree) and each node is reached by a unique access sequence from the root of the OTree. Access sequences as the first parts of sequences in the OTree are used to lead to a particular state from which a transition is to be tested or the target state of the transition which to be identified if it is not known. In contrast, separating sequences are used to identify the state in which they start. The third part, that is, the extension, is needed when one works with the assumption of extra states. These extensions have the length up to the considered number  $l$  of extra states in order to reach states that could be ‘extra’ with respect to the conjectured model, that is, such states could be different from those corresponding to the reference nodes. The purpose of the separating sequences is thus to determine if these states are different or not.

The correspondence between the conjectured model and the observation tree is based on the reference nodes that represent states of the conjectured model. Every two reference nodes are distinguished in the OTree by different responses to the same input sequence that starts in both RNs. Transitions are defined such that the target state is determined according to the corresponding successor  $r$  of the RN, that is, if there is a transition labelled with the input  $a$  leading from the RN of state  $s_i$  to the node  $r$  corresponding to the state  $s_j$ , then the conjectured model contains the transition  $(s_i, a)$  leading to  $s_j$ . The correspondence of the successor  $r$  and the state  $s_j$  is based on the sufficient conditions for the used FSM testing method that also depends on the number  $l$  of extra states. Basically, the successor  $r$  needs to be distinguished from the RNs of states different from  $s_j$  and the successors of  $r$  reached by a sequence of the length up to  $l$  need to correspond to a single RN as well. Moreover, these successors of  $r$  need to be distinguished one from the other if the one is a successor of the other one. If all the transitions are defined with respect to the assumed number  $l$  of extra states, then the observation tree is *closed* for  $l$  extra states.

## 4.3. Learning Process

The learning process of the learner that is based on the OTree approach (Algorithm 1) can be divided into two phases. In the first phase, the learner constructs a completely-specified conjectured model as the standard learning algorithms do, that is, the observation tree is made closed for 0 extra states and all transitions are defined. In the second phase when the learner makes the OTree closed for the number  $l$  of extra states such that  $l > 0$ , all transitions are considered defined but unverified. Note that undefined transitions are also unverified. Any response observed for the first time can break the consistency between the conjectured model and the OTree. It means that the conjectured model can no longer model the observed traces as the black box has more states than the conjectured model. The inconsistency

**Algorithm 1:** Learner based on the observation tree approach

---

```

input : A teacher providing information about the black box through output and equivalence queries
input :  $maxExtraStates$  as the maximal number of extra states to be considered during learning
output: A conjectured model  $M$ 

1 repeat
2   for  $l \leftarrow 0$  to  $maxExtraStates$  do
3     // make the observation tree  $T$  closed for  $l$  extra states
4     while there is an unverified transition do
5        $(s, x) \leftarrow$  choose an unverified transition
6       if  $l = 0$  then //  $t$  is not defined in  $M$ 
7         | identify state  $\delta(s, x)$  using adaptive separating sequences
8       else
9         | verify transition  $(s, x)$  using testing theory,  $l$  extra states
10      if observed responses and outputs of  $M$  differ then
11        | RESOLVEINCONSISTENCY( $T, M$ ):
12        |   query appropriate sequences to reveal a new state
13        |   update the conjectured model  $M$ 
14        |  $l \leftarrow 0$  // assume 0 extra states again as
15        | break // some transitions are not defined in  $M$ 
16  if equivalence query returns a counterexample  $w$  then
17    | query  $w$  and RESOLVEINCONSISTENCY( $T, M$ )
18 until EQ reports that  $M$  is correct or EQs are not allowed or the user is satisfied with  $M$ 

```

---

is resolved by localizing a new reference node which usually requires several output queries that distinguish a node from all current reference nodes. This process is described by the **RESOLVEINCONSISTENCY** function (discussed later) which is also used after the teacher provides a counterexample in response to an equivalence query. The purpose of a counterexample is to show an inconsistency between the OTree and the conjectured model. After resolving the inconsistency, the transitions from the new state are usually not defined, therefore, the number  $l$  of assumed extra state is reset to 0. If there is no inconsistency observed in the second phase and the number  $l$  reaches the given number  $maxExtraStates$ , an equivalence query can be asked. The learning can stop for three reasons: (1) either the conjectured model is correct as no counterexample is returned to an EQ, or (2) EQs are not allowed at all because the teacher has no capability to answer this type of query, or (3) the user is satisfied with the conjectured model. The last reason could be used in the following scenario. The user starts the learner with a large value for  $maxExtraStates$ . Most states are revealed by the assumption of 1 extra state, that is,  $l = 1$ . A few last states are harder to reveal and so the learner starts to increase  $l$ . The number of output queries grows exponentially with the increasing  $l$  and so it takes more time to reveal these ‘hidden’ states. The learner provides the user with the guarantee of  $l$  extra states (Definition 4.1) and the user can be satisfied with the number of revealed states so that the user stops the learning even if  $l$  does not reach the given  $maxExtraStates$ . The exponential growth is due to the complexity of FSM testing that nevertheless secures the

guarantee.

The first phase of the learning depends on so-called *adaptive separating sequences*. An adaptive separating sequence groups separating sequences with the same prefix so that it looks like a tree. Each transition corresponds to an input and branches reflect different outputs from the black box. It is used to identify the target state of a transition that is not defined yet. If the corresponding node, that is, the successor of a RN, is not distinguished from more than one RN, then the separating sequences of these ‘undistinguished’ RNs captured in the OTree form adaptive separating sequences such that each starts with a different input symbol. To reduce the amount of testing, the input that distinguishes the most ‘undistinguished’ RNs is then queried. Note that only one separating sequence is queried out of all sequences that form the chosen adaptive separating sequence because the input to be queried next is selected based on the observed response to the previous input. This is a change compared to the standard learning algorithms that ask output queries on entire input sequences, not symbol by symbol. The use of adaptive separating sequences thus reduces the number of queried symbols.

#### 4.4. Running Example

Figure 3 shows how the learning of the GridWorld map E (Fig. 1) could start. The observation tree on the left captures the first 5 queries that correspond to the numbers labelling nodes of the tree. At first, the output of the initial state is obtained by asking  $\uparrow$ . Then, the learner asks for the response on ‘left  $\cdot$   $\uparrow$ ’. The response N to  $\uparrow$  suggests

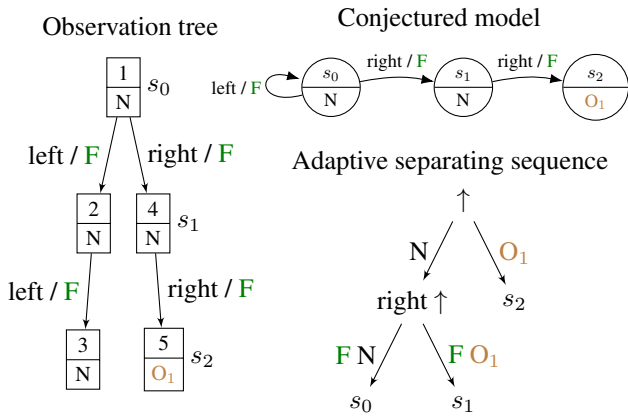

FIGURE 3. Beginning of learning the GridWorld example

that the transition on input ‘left’ leads back to the initial state  $s_0$ . It is confirmed by the same response to ‘left · ↑’ queried from the reached state  $\delta(s_0, \text{left})$ . The fourth query checks the transition on ‘right’ from the initial state. The reached state produces the output N, hence, it seems to equal to  $s_0$ . Nevertheless, the response to another ‘right · ↑’ (fifth query) differs from the expected one. The observed difference leads to the identification of two states,  $s_1$  and  $s_2$ , that are reached by ‘right’ and ‘right · right’ from the initial state, respectively. All three states can be distinguished by separating sequences ‘↑’ and ‘right · ↑’ that can be combined in the adaptive distinguishing sequence shown in Fig. 3.

#### 4.5. Novel Learners

The H-, SPY- and S- learners are novel learning algorithms that follow the observation tree approach and so outperform the standard learning algorithms. They differ in the choice of testing method by which they are inspired. It influences the choice of access and separating sequences as is summarized in Table 1. The *H-learner* is the simplest of the three. It is inspired by the H-method [19] and so it always uses the shortest access sequences of reference nodes. In the second phase of the learning, it chooses separating sequences on-the-fly from the observed ones in order to distinguish the reached node from one reference node that corresponds to a different state. The *SPY-learner* is inspired by the SPY-method [20]. In addition to the shortest access sequences of RNs, it can employ the access sequence of nodes that were proven to be *convergent* with RNs. The convergence of two sequences (or the reached nodes of OTree) means that both sequences lead to the same state in all machines with up to  $m$  states that provide expected responses to queried sequences [20]. This paper considers the system to learn has at most  $m$  states where  $m$  equals the number  $n$  of states in the specification plus the number  $l$  of considered extra states. The convergence provides a way to minimize the number of output queries by appending the needed separating sequences over convergent sequences. The drawback of the SPY-learner is the use of fixed separating sequences formed in the harmonized state identifiers (HSI) that is not so efficient compared to separating sequences chosen on-the-fly by the H-learner. The *S-learner* is similar to the SPY-learner

| Learner     | Access sequences   | Separating sequences                           |
|-------------|--------------------|------------------------------------------------|
| H-learner   | fixed              | chosen on-the-fly to distinguish from one RN   |
| SPY-learner | fixed + convergent | fixed – formed in HSI                          |
| S-learner   | fixed + convergent | chosen on-the-fly to distinguish from most RNs |

TABLE 1. The choice of access and separating sequences by the three new learners.

in the first phase, that is, it utilizes the convergence of access sequences and employs adaptive separating sequences. The second phase is delegated to the S-method that is a new testing method that is an improvement of the SPYH-method [21]. It makes the given OTree (considered as a testing tree) closed for the given number of states by extending some sequences. It works with the convergence of sequences and separating sequences are chosen based on the splitting tree that allows one to distinguish most ‘undistinguished’ RNs. Hence, it is more efficient than the H- and SPY- methods. Their implementation can be found in the FSMlib [28].

#### 4.6. Resolving Inconsistencies

An inconsistency of the conjectured model and the OTree can be observed in different ways depending on the implementation of the learner. All three new learners use the notion of domains of states associated with each node of the OTree. Domains capture the similarity of the corresponding node to the reference nodes. Hence, a RN  $s$  is not in the domain of node  $r$  if a separating sequence of  $s$  and  $r$  was observed. The basic inconsistency is revealed if a node  $r$  has an empty domain. It means that  $r$  is distinguished from all RNs and so it represents another state of the system;  $r$  becomes a new RN. Another type of inconsistency is when a node  $r$  should correspond to a particular state of the conjectured model but the corresponding RN  $s$  is not in the domain of  $r$ . Such an inconsistency is called *inconsistent domain* and can be resolved by querying several sequences that reveal the basic inconsistency in a form of an empty domain. The sequences are formed from the separating sequence of  $r$  and  $s$  (captured in the OTree) prepended with suffixes of the access sequence of  $r$ . The sequences are queried starting from the shortest and each is queried from the RN that corresponds to the node where the sequence begins in the OTree. There are two other types of inconsistency that can be observed by the SPY- and S-learners as they employ the convergence of sequences. Both learners group OTree nodes in *convergent nodes* (CN) if their access sequences were proven to be convergent. It means that a so-called convergent graph is built on top of the OTree. If any two OTree nodes belonging to different CNs are shown to be convergent, then the CNs are merged so that the convergent graph is equivalent to the conjectured model in the end of learning. As all OTree nodes of a CN need to correspond to a single state, there are also CN domains that keep track which state the CN can correspond to. The inconsistency is observed if a CN domain is empty or if a CN cannot be merged successfully into the

corresponding CN of RN because some of their successors are incompatible. These two inconsistencies are resolved by reducing the domain of a particular OTree node  $r$  using observed separating sequences of other OTree nodes that were (possibly incorrectly) in the same CN as  $r$ .

#### 4.7. Comparison with an Observation Pack

The proposed observation tree approach is more general than the framework of observation pack (OP) [13] as the following shows. First, each state has a fixed verifying component of separating sequences in the OP; components thus corresponds to HSIs. Therefore, the H-learner does not implement the OP framework. Second, the OP does not allow different access sequences of a single state, that is, the convergence of sequences is not considered. Therefore, the SPY- and S- learners do not implement the OP framework.

#### 4.8. Time Complexity

The time complexity of the observation tree approach depends mainly on the number of considered extra states. Any learner that uses a testing method to approximate equivalence queries is bound by the time complexity of the used testing method. In the worst case, it is exponential in the number  $l$  of extra states with the base of the number  $p$  of inputs because all sequences of the length  $l$  need to be examined from every state in order to secure the guarantee (Definition 4.1). Nevertheless, the average case is nearly always much smaller. Theoretical evaluation of such an average complexity is the subject of future work. If no extra state is considered, then the complexity relates to the size of the OTree which is polynomial in the number  $n$  of states in this case. The complexity is also influenced by provided counterexamples that could be of arbitrary length in general.

## 5. EXPERIMENTS

This section describes an experimental evaluation that aims to address the following two research questions:

- Q1. Is practical complexity of automata inference using new methods significantly better than that of existing methods?
- Q2. Is it practical to learn accurate models in the presence of extra states?

The three new learners were compared with the standard learning algorithms experimentally on the GridWorld map E (Fig. 1), on three real system models and on a set of randomly-generated machines. GridWorld had no model available and so it was learnt by interaction and equivalence queries were approximated by a testing method. The interaction with GridWorld was done through a mapper that translates symbolic inputs to real actions and observed responses to symbolic outputs. Hence, the GridWorld learning is the most realistic experiment. Random machines show that the learners are very effective on a range of different DFSMs and finally three models of real systems are shown where learners exhibit similar trends to both GridWorld and randomly-generated machines.

### 5.1. GridWorld Case Study

The learnt model of the GridWorld map E is visualized in Fig. 4 using the FSMvis that is a part of the FSMlib. The learning metrics of 6 learners are captured in Table 2. The algorithms are compared on the numbers of resets, queried symbols, output queries, equivalence queries, GridWorld simulation steps and the learning time in seconds. The three new learners were not allowed to ask EQ but they can learn the correct model with the assumption of only one extra state. Therefore, when they assume 2 extra states (ES), they also do not need the teacher but they provide a stronger guarantee about the states of the black box. The most efficient of the standard learning algorithms is the Quotient algorithm that however needs 4 EQs (implemented by the SPY-method and 0 ES). Test sequences generated by the SPY-method are queried by the teacher starting with the shortest ones, hence, the shortest counterexample is provided. The results in Table 2 show the lowest number of extra states that the SPY-method needs to assume in order to find a counterexample for each faulty conjectured model that the standard learning algorithms create. A faulty conjectured model is simply each that has less than 32 states. It is not mentioned in Table 2 but the S-learner assuming 1 ES learns the map E only in 7894 simulation steps and in the next 23228 steps the learner verifies the absence of another state.

### 5.2. Randomly Generated Machines

Figure 5 depicts the results of learning randomly-generated DFSMs. The algorithms were compared on 3400 DFSMs, 3400 Mealy machines, 3400 Moore machines and 3400 deterministic finite automata (DFA) such that all of them except DFA have 5 outputs. For each machine type, half of machines has 5 inputs and the others 10 inputs, both halves are divided into 17 groups of 100 machines with the same number of states that ranges from 10 to 1000. Target states of transitions and outputs are first chosen at random and then some are changed in order to create initially connected machine with the presence of each output symbol. If the generated machine is not strongly connected, then it is deleted and another machine is generated. A machine is strongly connected if there is a directed path between any two states. As the black box is known to the teacher, it provides the shortest counterexamples in response to an equivalence query if the conjectured model is not output-equivalent to the black box. The shortest counterexample is obtained by the breadth-first search in the product machine of the black box and the given conjectured model.

The figures in Fig. 5 show the first and the third quartiles calculated for each ‘state group’ of 100 DFSMs with 5 inputs. In addition, the boxplots on the right of each graph also capture minimum and maximum values for the machines with 1000 states. All machines with the results are available in the GitHub repository FSMmodels [31].

The *exploration efficiency* (EE) is a new objective developed by the authors. It is calculated as the number of edges in the OTree divided by the total number of queried symbols. It permits one to evaluate how much of the black



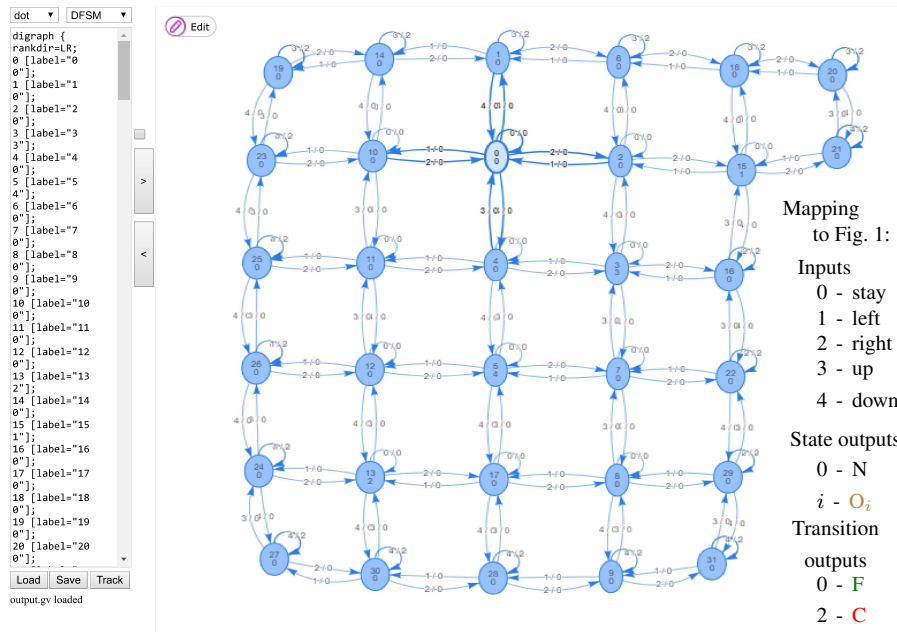

**FIGURE 4.** Learnt model of the GridWorld map E. States, inputs and outputs are numbered from 0. Highlighted state 0 (with the output 0 shown below) is the initial state.

| Learning algorithm        | Resets | Symbols | OQs    | EQs      | Seconds | Steps   |
|---------------------------|--------|---------|--------|----------|---------|---------|
| <b>S-learner: 1 ES</b>    | 486    | 9 784   | 3 859  | <b>0</b> | 620     | 31 122  |
| <b>H-learner: 1 ES</b>    | 1 026  | 10 028  | 2 618  | <b>0</b> | 829     | 41 434  |
| Quotient                  | 1 110  | 7 487   | 1 110  | 4        | 615     | 48 652  |
| + SPY-method: 0 ES        | 377    | 4 835   |        |          |         |         |
| <b>SPY-learner: 1 ES</b>  | 1 801  | 17 415  | 4 058  | <b>0</b> | 1 345   | 74 651  |
| <b>S-learner: 2 ES</b>    | 2 005  | 51 300  | 20 997 | 0        | 3 443   | 156 357 |
| <b>H-learner: 2 ES</b>    | 4 185  | 44 325  | 10 565 | 0        | 3 314   | 186 274 |
| TTT                       | 1 363  | 7 870   | 1 363  | 11       | 4 145   | 378 793 |
| + SPY-method: 2 ES        | 6 864  | 131 212 |        |          |         |         |
| <b>SPY-learner: 2 ES</b>  | 9 630  | 96 493  | 18 177 | 0        | 8 134   | 432 450 |
| L* <sub>AllPrefixes</sub> | 3 444  | 28 062  | 3 444  | 8        | 4 664   | 445 285 |
| + SPY-method: 2 ES        | 5 641  | 115 749 |        |          |         |         |

**TABLE 2.** Learning GridWorld map E: learners are sorted by the number of simulation steps (last column) that corresponds to the amount of interaction, that is, the number of resets of the black box plus the number of symbols queried during the learning by both the learner and the teacher. The teacher gets a counterexample to equivalence queries by the SPY-method.

box is explored and how much effort was put in it. The greater the value, the better the learner is.

The new learners assuming 0 extra states (ES) can be directly compared with the standard learning algorithms. They outperform the DT and TTT algorithms in all measures (besides time). They are more efficient than the other standard algorithms in the numbers of OQs, queried symbols and resets and in the exploration efficiency. However, they have a greater number of EQs because they build a completely-specified model fast with the least number of symbols which means very little exploration and hence a low chance to find an inconsistency. This is balanced by the new learners assuming 1 ES that query about the same number of symbols as the standard algorithms but reset the black box less and need no EQ to learn. Moreover, they provide the guarantee at the end that there is not one extra state. Note

that all learners were allowed to ask EQ, therefore, they ask at least one EQ, the last one, which confirms that the conjectured model is correct. The DFSMs with 10 inputs as well as the 10 200 randomly generated machines of the other three machine types produce results with the same trends of the learners' performance as in Fig. 5.

### 5.3. Real Systems

Table 3 shows the results of learning a scheduler. Its model is referred `sched4` in the literature [14, 12] and it is a deterministic finite automaton with 97 states and 12 inputs. The teacher provides the shortest counterexamples. The results are similar for the other two models of real systems that are called `peterson2` and `sched5`. The results also capture the same trends observed on randomly-generated

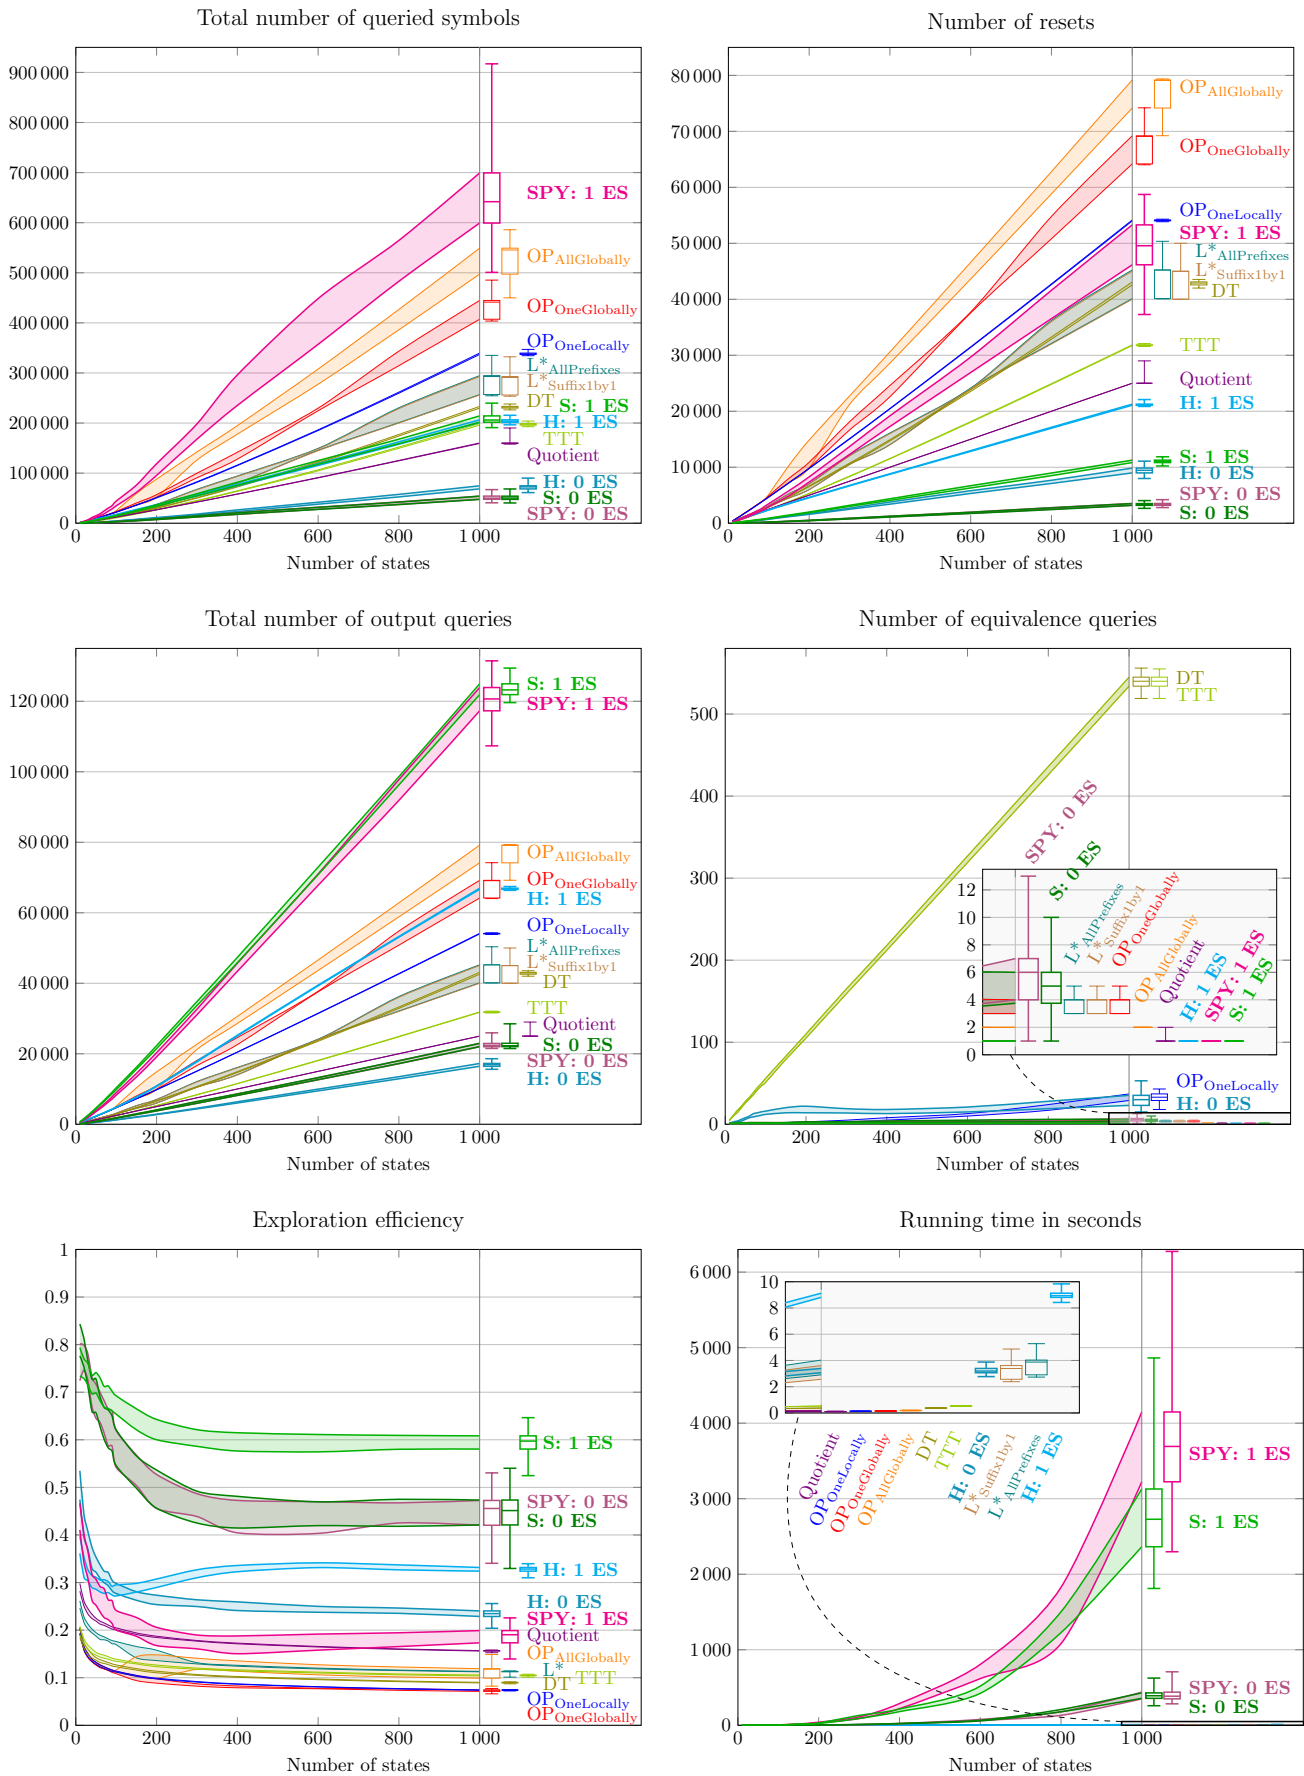

**FIGURE 5.** Comparison of learning algorithms on 17 groups of 100 randomly-generated DFSMs with 5 inputs and 5 outputs such that the groups vary in the number of states, from 10 to 1000.

| Learning algorithm        | Resets  | Symbols   | EQs      | Seconds | EE [%] |
|---------------------------|---------|-----------|----------|---------|--------|
| <b>SPY-learner: 0 ES</b>  | 2 007   | 25 334    | 68       | 9.14    | 14.3   |
| <b>S-learner: 0 ES</b>    | 2 017   | 25 438    | 65       | 9.09    | 14.0   |
| <b>H-learner: 0 ES</b>    | 2 307   | 28 913    | 78       | 0.55    | 11.0   |
| TTT                       | 3 606   | 43 757    | 94       | 0.03    | 5.5    |
| DT                        | 11 805  | 110 183   | 96       | 0.05    | 2.2    |
| <b>S-learner: 1 ES</b>    | 14 107  | 178 965   | <b>1</b> | 181.94  | 9.8    |
| <b>H-learner: 1 ES</b>    | 14 254  | 190 634   | <b>1</b> | 5.42    | 14.8   |
| <b>SPY-learner: 1 ES</b>  | 15 908  | 203 289   | <b>1</b> | 350.83  | 9.0    |
| Quotient                  | 16 741  | 206 793   | 4        | 0.14    | 8.3    |
| OP <sub>OneLocally</sub>  | 18 322  | 224 021   | 18       | 0.10    | 6.3    |
| L* <sub>Suffix1by1</sub>  | 18 655  | 231 131   | 15       | 0.16    | 7.4    |
| OP <sub>OneGlobally</sub> | 21 736  | 269 173   | 4        | 0.12    | 6.4    |
| L* <sub>AllPrefixes</sub> | 23 235  | 283 013   | 12       | 0.19    | 7.6    |
| OP <sub>AllGlobally</sub> | 63 670  | 1 056 247 | 4        | 0.60    | 18.4   |
| GoodSplit: $l = 2$        | 149 591 | 1 944 084 | 2        | 42.87   | 7.8    |

**TABLE 3.** Learning `sched4`: learners are sorted by the amount of interaction, that is, the number of resets of the black box plus the number of input symbols queried during the learning

machines (Fig. 5). Hence, the improvement by the new learners is more than promising. As in the case of randomly-generated machines, all three models with the results of experiments are available in the repository `FSMmodels`.

#### 5.4. Results

The research questions are answered based on the experiment results as follows.

*Q1.* The experimental evaluation shows that the new methods are more efficient than the standard learning algorithms in the interaction with the black box.

*Q2.* There is always exponential growth in complexity if one works with extra states. Nevertheless, the results show that the assumption of one or two extra states is sufficient to learn a correct model and no equivalence query is needed.

#### 5.5. Threats to Validity

Automata used for experiments are not representative of those seen in real life. This is mitigated by generating both random machines and by using actual case studies. In order to make it less likely to have a bias in the generation of random machines, a machine that is not strongly connected is discarded and a new one generated. Case studies were chosen from different domains, including both AI (`GridWorld`) and real software.

Equivalence queries are cheap when one has access to an efficient oracle. This is usually encountered in model verification where models could be generated by abstraction of more complex models in order to check compliance with temporal logic formulae [32, 33]. The work considered in this paper is aimed at building models of actual software so an oracle has to consult the source code or an executable which makes this task computationally expensive (existing methods use testing).

## 6. CONCLUSION

The proposed observation tree approach allows one to employ testing theory in active learning which improves the learning performance. The improvement is both in the construction of a completely-specified conjectured model and in the reduction of dependency on the teacher. The conjectured model can be constructed using much less interaction with the black box than the standard learning algorithms need because of the analysis of observed traces and the use of appropriate separating sequences which is what advanced testing methods do. The assumption of extra states can guide the exploration of the black box in order to reveal other states efficiently and thus reduce the number of equivalence queries (which corresponds to the need of an efficient teacher). The complexity grows exponentially with the number of assumed extra states. The experiments show that the assumption of a single extra state is usually sufficient to learn a correct model without any counterexample provided by the teacher. Moreover, all three new learners based on the observation tree approach need about the same (or less) amount of interaction with the black box to learn it even if they assume one extra state.

The three new learners differ in the choice of a testing method which they are based on. It means that they trade-off the complexity of their algorithm and their learning efficiency differently. Future work involves evaluation of these learners on larger real systems and with a teacher providing non-optimal counterexamples.

## REFERENCES

- [1] GoodAI (2018). BrainSimulator. <https://www.goodai.com/brain-simulator>. Last accessed: 10 October 2018.
- [2] Rivest, R. L. and Schapire, R. E. (1993) Inference of finite automata using homing sequences. *Information and Computation*, **103**, 299–347.
- [3] Vasilevskii, M. (1973) Failure diagnosis of automata.

- Cybernetics and Systems Analysis*, **9**, 653–665.
- [4] Chow, T. S. (1978) Testing software design modeled by finite-state machines. *Software Engineering, IEEE Transactions on*, **4**, 178–187.
- [5] Gold, E. M. (1972) System identification via state characterization. *Automatica*, **8**, 621–636.
- [6] Angluin, D. (1987) Learning regular sets from queries and counterexamples. *Information and computation*, **75**, 87–106.
- [7] Shahbaz, M. and Groz, R. (2009) Inferring mealy machines. *FM 2009: Formal Methods*, pp. 207–222. Springer, Berlin.
- [8] Isberner, M. and Steffen, B. (2014) An abstract framework for counterexample analysis in active automata learning. *International Conference on Grammatical Inference*, Kyoto, Japan, September, pp. 79–93. PMLR.
- [9] Irfan, M. N. (2010) State machine inference in testing context with long counterexamples. *Software Testing, Verification and Validation (ICST), 2010 Third International Conference on*, Paris, France, April, pp. 508–511. IEEE Computer Society.
- [10] Niese, O. (2003) An integrated approach to testing complex systems. PhD thesis Technical University of Dortmund Dortmund, Germany.
- [11] Kearns, M. and Vazirani, U. V. (1994) *An introduction to computational learning theory*. The MIT Press, Cambridge, MA.
- [12] Isberner, M., Howar, F., and Steffen, B. (2014) The TTT algorithm: a redundancy-free approach to active automata learning. *Runtime Verification*, Toronto, Canada, September, pp. 307–322. Springer.
- [13] Balcázar, J. L., Díaz, J., Gavalda, R., and Watanabe, O. (1997) Algorithms for learning finite automata from queries: A unified view. In Ding-Zhu Du, K.-I. K. (ed.), *Advances in Algorithms, Languages, and Complexity*, pp. 53–72. Springer.
- [14] Howar, F. M. (2012) Active learning of interface programs. PhD thesis Technical University of Dortmund Dortmund, Germany.
- [15] Eisenstat, S. and Angluin, D. (2010) Learning random DFAs with membership queries: the GoodSplit algorithm. *ZULU workshop organised during ICGI*, Valencia, Spain, September 12. Springer.
- [16] Berg, T., Grinchtein, O., Jonsson, B., Leucker, M., Raffelt, H., and Steffen, B. (2005) On the correspondence between conformance testing and regular inference. In Cerioli, M. (ed.), *Fundamental Approaches to Software Engineering*, April, pp. 175–189. Springer, Edinburgh, UK.
- [17] Groz, R., Irfan, M.-N., and Oriat, C. (2012) Algorithmic improvements on regular inference of software models and perspectives for security testing. In Tiziana Margaria, B. S. (ed.), *Leveraging Applications of Formal Methods, Verification and Validation. Technologies for Mastering Change*, October, pp. 444–457. Springer, Crete, Greece.
- [18] Petrenko, A., Li, K., Groz, R., Hossen, K., and Oriat, C. (2014) Inferring approximated models for systems engineering. *High-Assurance Systems Engineering (HASE), 2014 IEEE 15th International Symposium on*, Miami Beach, FL, January, pp. 249–253. IEEE.
- [19] Dorofeeva, R., El-Fakih, K., and Yevtushenko, N. (2005) An improved conformance testing method. In Wang, F. (ed.), *Formal Techniques for Networked and Distributed Systems-FORTE 2005*, October, pp. 204–218. Springer, Taipei, Taiwan.
- [20] Simão, A., Petrenko, A., and Yevtushenko, N. (2012) On reducing test length for FSMs with extra states. *Software Testing, Verification and Reliability*, **22**, 435–454.
- [21] Soucha, M. and Bogdanov, K. (2018) SPYH-method: An improvement in testing of finite-state machines. *2018 IEEE International Conference on Software Testing, Verification and Validation Workshops (ICSTW)*, Vasteras, Sweden, April, pp. 194–203. IEEE.
- [22] Soucha, M. (2015) Checking experiment design methods. Master’s thesis. Czech Technical University in Prague.
- [23] Groce, A., Peled, D., and Yannakakis, M. (2002) Adaptive model checking. *Tools and Algorithms for the Construction and Analysis of Systems*, April, pp. 357–370. Springer, Berlin.
- [24] Elkind, E., Genest, B., Peled, D., and Qu, H. (2006) Grey-box checking. *International Conference on Formal Techniques for Networked and Distributed Systems*, Berlin, September, pp. 420–435. Springer.
- [25] Peled, D., Vardi, M. Y., and Yannakakis, M. (1999) Black box checking. *Formal Methods for Protocol Engineering and Distributed Systems*, pp. 225–240. Springer, Boston, MA.
- [26] Raffelt, H., Steffen, B., Berg, T., and Margaria, T. (2009) Learnlib: a framework for extrapolating behavioral models. *International journal on software tools for technology transfer*, **11**, 393–407.
- [27] Bollig, B., Katoen, J.-P., Kern, C., Leucker, M., Neider, D., and Piegdon, D. R. (2010) libalf: The automata learning framework. *Computer Aided Verification*, Berlin, July, pp. 360–364. Springer.
- [28] Soucha, M. (2018). FSMlib. <https://github.com/Soucha/FSMlib>. Last accessed: 10 October 2018.
- [29] Petrenko, A. (1991) Checking experiments with protocol machines. *Proceedings of the IFIP TC6/WG6. 1 Fourth International Workshop on Protocol Test Systems IV*, Amsterdam, The Netherlands, October, pp. 83–94. North-Holland Publishing Co.
- [30] Lang, K. J., Pearlmutter, B. A., and Price, R. A. (1998) Results of the Abbadingo one DFA learning competition and a new evidence-driven state merging algorithm. In Honavar, V. and Slutzki, G. (eds.), *Grammatical Inference; 4th International Colloquium, ICGI-98*, Berlin, July, LNCS/LNAI, **1433**, pp. 1–12. Springer.
- [31] Soucha, M. (2018). FSMmodels v1.3. <https://github.com/Soucha/FSMmodels/releases/tag/v1.3>. Last accessed: 10 October 2018.
- [32] Păsăreanu, C. S., Giannakopoulou, D., Bobaru, M. G., Cobleigh, J. M., and Barringer, H. (2008) Learning to divide and conquer: applying the I\* algorithm to automate assume-guarantee reasoning. *Formal Methods in System Design*, **32**, 175–205.
- [33] Emmi, M., Giannakopoulou, D., and Pasareanu, C. S. (2008) Assume-guarantee verification for interface automata. In Cuéllar, J., Maibaum, T. S. E., and Sere, K. (eds.), *International Symposium on Formal Methods*, Berlin, May, pp. 116–131. Springer.
